2 **COVID-19 serology at population scale: SARS-CoV-2-specific antibody responses in saliva**

3

4 **Authors**

5 Pranay R. Randad<sup>1\*</sup>, Nora Pisanic<sup>1\*</sup>, Kate Kruczynski<sup>1</sup>, Yukari C. Manabe<sup>2,3</sup>, David Thomas<sup>2</sup>,  
6 Andrew Pekosz<sup>1,4</sup>, Sabra L. Klein<sup>4,5</sup>, Michael J. Betenbaugh<sup>6</sup>, William A. Clarke<sup>3</sup>, Oliver  
7 Laeyendecker<sup>2,7,8</sup>, Patrizio P. Caturegli<sup>3,9</sup>, H. Benjamin Larman<sup>3,9</sup>, Barbara Detrick<sup>3,9</sup>, Jessica K.  
8 Fairley<sup>10</sup>, Amy C. Sherman<sup>11</sup>, Nadine Rouphael<sup>11</sup>, Srilatha Edupuganti<sup>11</sup>, Douglas A. Granger<sup>12</sup>,  
9 Steve W. Granger<sup>13</sup>, Matthew Collins<sup>11</sup>, Christopher D. Heaney<sup>1,6,14</sup>

10

11 **Affiliations**

12 \*Contributed equally

13 <sup>1</sup>Department of Environmental Health and Engineering, Bloomberg School of Public Health,  
14 Johns Hopkins University, Baltimore, Maryland, USA

15 <sup>2</sup>Division of Infectious Diseases, Department of Medicine, School of Medicine, Johns Hopkins  
16 University, Baltimore, Maryland, USA

17 <sup>3</sup>Department of Pathology, School of Medicine, Johns Hopkins University, Baltimore, Maryland,  
18 USA

19 <sup>4</sup>Department of Molecular Microbiology and Immunology, Bloomberg School of Public Health,  
20 Johns Hopkins University, Baltimore, Maryland, USA

21 <sup>5</sup>Department of Biochemistry and Molecular Biology, Bloomberg School of Public Health, Johns  
22 Hopkins University, Baltimore, Maryland, USA

23 <sup>6</sup>Department of Chemical and Biomolecular Engineering, Whiting School of Engineering, Johns  
24 Hopkins University, Baltimore, Maryland, USA

25 <sup>7</sup>Department of Epidemiology, Bloomberg School of Public Health, Johns Hopkins University,  
26 Baltimore, Maryland, USA

27 <sup>8</sup>Division of Intramural Research, National Institute of Allergy and Infectious Diseases, National  
28 Institutes of Health, Baltimore, Maryland, USA

29 <sup>9</sup>Division of Immunology, Department of Pathology, School of Medicine, Johns Hopkins  
30 University, Baltimore, Maryland, USA

31 <sup>10</sup>Hubert Department of Global Health, Emory University Rollins School of Public Health,  
32 Atlanta, GA, USA

33 <sup>11</sup>The Hope Clinic of the Emory Vaccine Center, Division of Infectious Diseases, Department of  
34 Medicine, Emory University School of Medicine, Decatur, Georgia, USA

35 <sup>12</sup>Institute for Interdisciplinary Salivary Bioscience Research, University of California Irvine,  
36 Irvine, California, USA

37 <sup>13</sup>Salimetrics, LLC, Carlsbad, California, USA

38 <sup>14</sup>Department of International Health, Bloomberg School of Public Health, Johns Hopkins  
39 University, Baltimore, Maryland, USA

40

41

42 **Keywords**

43 SARS-CoV-2, COVID-19, saliva, oral fluid, serology, antibody test, multiplex

44

45 **40-word summary**

46 A multiplex immunoassay to detect SARS-CoV-2-specific antibodies in saliva performs with  
47 high diagnostic accuracy as early as ten days post-COVID-19 symptom onset. Highly sensitive  
48 and specific salivary COVID-19 antibody assays could advance broad immuno-surveillance  
49 goals in the USA and globally.

50

## 51 **Author Contributions**

52 All authors reviewed and edited all sections of the article. P.R.R. and N.P. wrote the first draft of  
53 the manuscript. K.K. and N.P handled laboratory logistics and generated data. N.P. and P.R.R.  
54 analyzed and summarized the data. A.P. provided input on study design and edited the  
55 manuscript. M.J.B., S.W.G., D.A.G. provided input on antigen selection, assay design, and  
56 interpretation of results. Y.C.M and D.T. provided input on study design and interpretation of  
57 results. B.D. provided input on interpretation of results. W.A.C, O.L., P.P.C., and B.L. shared  
58 samples and data for the analysis and provided input on interpretation of results. M.H.C  
59 developed project concept. M.H.C, N.R., J.F., and A.C.S. led and coordinated specimen  
60 collection efforts and reviewed and edited the article. C.D.H. developed project concept and  
61 guided the laboratory work.

62

## 63 **Conflict of interest**

64 In the interest of full disclosure, D.A.G. is founder and Chief Scientific and Strategy Advisor at  
65 Salimetrics, LLC and Salivabio, LLC and these relationships are managed by the policies of the  
66 committees on conflict of interest at Johns Hopkins School of Medicine and the University of  
67 California at Irvine. N.R. received funds from Sanofi Pasteur, Quidel, Merck and Pfizer.

68

## 69 **Acknowledgements**

70 We would like to thank the participants who provided saliva and blood specimens that were used  
71 in this study to help develop and validate the multiplex SARS-CoV-2 antibody assays. We thank  
72 the faculty and staff team of The Hope Clinic for a dedicated effort in recruiting subjects and  
73 collecting specimens. We thank Dr. Yerun Zhu and Dr. Daniel Espinoza for assistance with  
74 laboratory operations

75

## 76 **Sources of funding**

77 Funding for this study was provided by the Johns Hopkins University Provost's Office and the  
78 FIA Foundation. P.R.R., N.P., K.K., and C.D.H. were supported by a gift from the GRACE  
79 Communications Foundation. C.D.H., N.P., and B.D. were additionally supported by National  
80 Institute of Allergy and Infectious Diseases (NIAID) grants R21AI139784 and R43AI141265,  
81 and National Institute of Environmental Health Sciences (NIEHS) grant R01ES026973. C.D.H.  
82 was also supported by NIAID grant R01AI130066 and NIH grant U24OD023382. A.P. and  
83 S.L.K. were supported by NIH/NIAID Center of Excellence in Influenza Research and  
84 Surveillance contract HHS N2772201400007C. O.L. was supported by the Division of  
85 Intramural Research, NIAID. The funders had no role in study design, data analysis, decision to  
86 publish, or preparation of the manuscript.

87

## 88 **Ethical Statement**

89 This study has been approved by the Johns Hopkins Bloomberg School of Public Health  
90 Institutional Review Board (IRB) (IRB No. IRB00012253) Johns Hopkins Medicine IRB (IRB

- 91 No. IRB00247886) and by the Emory University Institutional Review Board (IRB No.  
92 00110683).

93 **Abstract**

94 Non-invasive SARS-CoV-2 antibody testing is urgently needed to estimate the incidence  
95 and prevalence of SARS-CoV-2 infection at the general population level. Precise knowledge of  
96 population immunity could allow government bodies to make informed decisions about how and  
97 when to relax stay-at-home directives and to reopen the economy. We hypothesized that salivary  
98 antibodies to SARS-CoV-2 could serve as a non-invasive alternative to serological testing for  
99 widespread monitoring of SARS-CoV-2 infection throughout the population. We developed a  
100 multiplex SARS-CoV-2 antibody immunoassay based on Luminex technology and tested 167  
101 saliva and 324 serum samples, including 134 and 118 negative saliva and serum samples,  
102 respectively, collected before the COVID-19 pandemic, and 33 saliva and 206 serum samples  
103 from participants with RT-PCR-confirmed SARS-CoV-2 infection. We evaluated the correlation  
104 of results obtained in saliva vs. serum and determined the sensitivity and specificity for each  
105 diagnostic media, stratified by antibody isotype, for detection of SARS-CoV-2 infection based  
106 on COVID-19 case designation for all specimens. Matched serum and saliva SARS-CoV-2  
107 antigen-specific IgG responses were significantly correlated. Within the 10-plex SARS-CoV-2  
108 panel, the salivary anti-nucleocapsid (N) protein IgG response resulted in the highest sensitivity  
109 for detecting prior SARS-CoV-2 infection (100% sensitivity at  $\geq 10$  days post-SARS-CoV-2  
110 symptom onset). The salivary anti-receptor binding domain (RBD) IgG response resulted in  
111 100% specificity. Among individuals with SARS-CoV-2 infection confirmed with RT-PCR, the  
112 temporal kinetics of IgG, IgA, and IgM in saliva were consistent with those observed in serum.  
113 SARS-CoV-2 appears to trigger a humoral immune response resulting in the almost  
114 simultaneous rise of IgG, IgM and IgA levels both in serum and in saliva, mirroring responses  
115 consistent with the stimulation of existing, cross-reactive B cells. SARS-CoV-2 antibody testing

116 in saliva can play a critically important role in large-scale “sero”-surveillance to address key  
117 public health priorities and guide policy and decision-making for COVID-19.

## 118 **Introduction**

119           The coronavirus disease 2019 (COVID-19) pandemic, caused by severe acute respiratory  
120 syndrome virus 2 (SARS-CoV-2), has caused >5.4 million COVID-19 cases and >344,000  
121 deaths, as of May 24, 2020, involving all populated continents.<sup>1</sup> The USA accounts for >1.6  
122 million COVID-19 cases and >97,000 deaths and the outbreak has expanded from urban to rural  
123 areas of the country.<sup>1</sup> There is a critical need to perform broad-scale population-based testing to  
124 improve COVID-19 prevention and control efforts. Some have even recommended national  
125 testing at repeated time points to improve understanding of the spatio-temporal dynamics of  
126 transmission, infection, and herd immunity.<sup>2,3</sup> Currently, population-level antibody testing is  
127 largely performed using blood, with preliminary seroprevalence study estimates ranging from  
128 2.8% in Santa Clara County, California,<sup>4</sup> 4.65% in Los Angeles County, California,<sup>5</sup> 21% in  
129 New York City,<sup>6</sup> 11.5% in Robbio Italy,<sup>7</sup> and 14% in Gangel, Germany.<sup>8</sup> Achieving such  
130 comprehensive national testing goals will be challenging by relying only on traditional blood-  
131 based diagnostic specimens as these may be considered too invasive, uncomfortable, or  
132 unacceptable, particularly among vulnerable and susceptible groups.<sup>9-12</sup>

133           In addition to molecular COVID-19 diagnostics, accurate serological tests can identify  
134 individuals who have mounted an antibody response to SARS-CoV-2 infection. These tests are  
135 needed in platforms that can be deployed in large numbers to describe changes in population  
136 level immunity at different geographical scales and over time. Such serological testing could  
137 guide “back-to-work” risk mitigation strategies<sup>2,3</sup>, particularly if evidence continues to emerge  
138 suggesting that robust SARS-CoV-2 antibody responses might confer protection from repeated  
139 infection.<sup>13,14</sup>



140 Saliva harvested from the space between the gums and the teeth is enriched with gingival  
141 crevicular fluid (GCF). The composition of GCF (hereafter referred to as “saliva”) resembles that  
142 of serum, and is enriched with antibodies.<sup>15-24</sup> Thus, sampling saliva with an appropriate  
143 collection method is an attractive non-invasive approach for antibody-based diagnostic  
144 techniques. We have previously demonstrated the utility of saliva-based serology testing for the  
145 diagnosis, surveillance, and study of infection by multiple viral pathogens.<sup>21,22</sup> Development of  
146 improved antibody assays to detect prior infection with SARS-CoV-2 has been identified as one  
147 of the top unmet needs in the ongoing COVID-19 pandemic response.<sup>2,3</sup> Precise knowledge of  
148 SARS-CoV-2 infection at the individual level can potentially inform clinical decision-making,  
149 whereas at the population level, precise knowledge of prior infection, immunity, and attack rates  
150 (particularly asymptomatic infection) is needed to prioritize risk management decision-making  
151 about social distancing, treatments, and vaccination (once the latter two become available).<sup>25</sup> If  
152 saliva can support measurements of both the presence of SARS-CoV-2 RNA<sup>26-28</sup> as well as  
153 antibodies against SARS-CoV-2, this sample type could provide an important opportunity to  
154 monitor individual and population-level SARS-CoV-2 transmission, infection, and immunity  
155 dynamics over place and time.

156 Prior studies have shown that antibodies to SARS-CoV-2 nucleocapsid protein (N), spike  
157 protein (S), and the receptor binding domain (RBD) are elevated in serum around 10-18 days  
158 following SARS-CoV-2 infection.<sup>14,29-32</sup> Many ELISA, point-of-care (POC), and lateral flow IgG  
159 assays for detecting prior SARS-CoV-2 infection that are currently available show a wide range  
160 in diagnostic performance. The sensitivity of the assays improves when samples are collected  
161 later after the onset of infection, from <20% sensitivity at <5 days to approximately 100%  
162 sensitivity at 17 to 20 days from symptom onset.<sup>33-35</sup>

163           In this study, we aimed to determine whether salivary SARS-CoV-2-specific antibody  
164 responses would identify prior SARS-CoV-2 infection with similar sensitivity and specificity as  
165 serum and whether salivary antibody testing would reflect the temporal profiles observed in  
166 serum. The objectives of this study were: (1) to develop and validate a multiplex bead-based  
167 immunoassay for detection of SARS-CoV-2-specific IgG, IgA, and IgM responses; (2) to  
168 describe the assay performance using saliva compared to using serum specimens; (3) to identify  
169 SARS-CoV-2 antigens that could result in high sensitivity and specificity to identify antibody  
170 responses to prior SARS-CoV-2 infection; and (4) to compare the antibody kinetics in saliva to  
171 those in serum by time since onset of COVID-19 symptoms.

172

## 173 **Methods**

### 174 *Sources of saliva and serum*

175           Saliva and serum samples were provided by collaborators from Emory University from  
176 patients in three settings: 1) PCR-confirmed COVID-19 cases while admitted to the hospital; 2)  
177 confirmed COVID-19 cases we invited to donate specimens after recovering from their acute  
178 illness; and 3) patients with symptoms consistent with COVID-19 being tested at an ambulatory  
179 testing center donated specimens at the time of testing and/or at a follow-up convalescent phase  
180 research visit. Collaborators at Johns Hopkins University provided: 1) serum samples from  
181 patients presenting with COVID-19-like symptoms such as fever, cough, dyspnea who were  
182 recruited in both inpatient and outpatient clinical care sites; and 2) negative saliva and serum  
183 samples collected prior to the COVID-19 pandemic. Participants provided verbal and / or written  
184 informed consent and provided saliva and blood specimens for analysis. Whenever possible,  
185 remnant clinical blood specimens were used. Basic data on days since symptom onset were

186 recorded for all participants as were results of COVID-19 molecular testing. Participation in  
187 these studies was voluntary and the study protocols have been approved by the respective  
188 Institutional Review Boards.

189

#### 190 *Saliva and blood sample collection*

191 Saliva samples were collected by instructing participants to gently brush their gum line  
192 with an OraCol S14 saliva collection device (Malvern Medical Developments, UK) for 1-2  
193 minutes, or until saturation. This saliva collection method specifically harvests GCF, which is  
194 enriched with primarily IgG antibody derived from serum.<sup>18</sup> The saturated sponge was then  
195 inserted into the storage tube, capped, and stored at 4°C until processing whenever possible.  
196 Saliva was separated from the OraCol S14 swabs through centrifugation (10 min at 1,500 g) and  
197 transferred into the attached 2 mL cryovial. Samples were heat-inactivated at 60°C for 30  
198 minutes and then shipped to the lab on dry ice. Blood samples were collected into ACD (acid,  
199 citrate, dextrose) or serum separator tubes (SST) and processed according to each clinical lab's  
200 procedure. Plasma/serum was also heat inactivated at 60°C for 30 minutes, aliquoted into 2mL  
201 cryovials, and stored at ≤20°C until analyzed. Only de-identified serum or plasma and saliva  
202 aliquots including limited metadata (days since symptom onset and SARS-CoV-2 RT-PCR status  
203 [ever positive or negative]) were shared for this study.

204

#### 205 *Multiplex magnetic microparticle (“bead”)-based SARS-CoV-2 saliva immunoassay*

206 Ten SARS-CoV-2 antigens were obtained commercially or from collaborators at Icahn  
207 School of Medicine at Mount Sinai (**Table 1**).<sup>36</sup> This included four SARS-CoV-2 receptor  
208 binding domain (RBD), one ectodomain (ECD) protein containing the S1 and S2 subunit of the

209 spike protein, two S1 subunits, one S2 subunit, and two N proteins. Each SARS-CoV-2 antigen,  
210 along with one SARS-CoV-1 antigen (NAC SARS 2002 N) and one human coronavirus (hCoV)-  
211 229E antigen (Sino Biol. hCoV 229E ECD), were covalently coupled to magnetic microparticles  
212 (MagPlex microspheres, Luminex) as described previously (**Table 1**).<sup>21,22</sup> Along with a control  
213 bead, conjugated with bovine serum albumin (BSA), the multiplex panel included a total of 13  
214 bead sets (10 bead sets coupled to SARS-CoV-2 antigens, one to SARS-CoV-1 antigen, one to  
215 hCoV-229E antigen, and one control bead coupled to BSA). Coupling of antigens to beads was  
216 confirmed using antibody against the antigen or against the tag (e.g. anti-His(6) tag antibody), if  
217 present (**Table 1**), followed by a species-specific R-phycoerythrin (PE)-labelled antibody and  
218 was considered successful if the median fluorescence intensity (MFI [a.u.]) was >10,000 at 1  
219 µg/mL of antigen-specific antibody (except the BSA-conjugated bead set). Saliva samples were  
220 centrifuged (5 minutes at 20,000g, 20°C), and 10 µL of saliva supernatant was added to 40 µL of  
221 assay buffer (phosphate-buffered saline with 0.05% Tween20, 0.02% sodium azide and 1%  
222 BSA) containing 1,500 beads of each bead set per microplate well. The plate was covered and  
223 incubated at room temperature for 1 hour on a plate shaker at 500 rpm. Beads were washed twice  
224 with 200 µL PBST and 50 µL of PE-labeled anti-human IgG, IgA or IgM diluted 1:100 in assay  
225 buffer were added, and the plate was incubated again for 1 hour on a plate shaker at 500 rpm.  
226 Beads were washed as above and then suspended in 100 µL of assay buffer. Finally, the MFI of  
227 each bead set was measured on a Bio-Plex® immunoassay instrument (Bio-Rad Laboratories,  
228 Hercules, CA). The same protocol was used for serum and plasma samples, except that serum  
229 and plasma samples were tested at a final dilution of 1:1000 in bead mix and assay buffer  
230 compared to a final dilution of 1:5 for saliva. A subset of 47 saliva samples were tested in  
231 duplicate and in a masked fashion to determine intra-assay variability (same 96 well plate) and

232 inter-assay variability (different 96 well plates on different days), and at least 2 blanks (assay  
233 buffer) were included on each plate for background fluorescence subtraction.

234

### 235 *Statistical analysis*

236 The median fluorescence intensity (MFI) measured using the BSA beads was subtracted  
237 from each blank-subtracted antigen-specific MFI signal for each sample to account for non-  
238 specific binding of antibodies to beads. The average MFI was used for samples that were tested  
239 in duplicate (n=47) or triplicate. Wilcoxon-Mann-Whitney test was used to compare the median  
240 MFI between samples collected <10 days post symptom onset and negatives, and between  
241 samples collected  $\geq$ 10 days post symptom onset and negatives, for each antigen in the multiplex.  
242 The average intra- and inter-assay variability was evaluated by determining the coefficient of  
243 variation (CV%) of a subset of 47 samples that were tested in duplicate (intra) and on different  
244 days and plates (inter). Pearson's correlation was used to determine the correlation between  
245 antigen-specific IgG, IgA, and IgM MFI in matched saliva and serum / plasma samples collected  
246 from the same person at the same time point (n=28). The average MFI of all saliva samples from  
247 known uninfected individuals (pre-Covid-19) plus three standard deviations for each antigen-  
248 specific IgG, IgA, and IgM were used to establish the cut-off values for a negative result. The  
249 corresponding procedure was used for serum samples. Because the prior hCoV infection status  
250 for saliva and serum samples was not known, the MFI cut-off values were not calculated for anti-  
251 Sino Biol. hCoV 229E ECD IgG, IgA, and IgM. Sensitivity and specificity for detecting samples  
252 from confirmed RT-PCR positive individuals and for samples from individuals obtained prior to  
253 the COVID-19 pandemic were determined for each antigen/isotype pair (IgG, IgM and IgA) in  
254 saliva and in serum. Locally weighted regression (LOESS) was used to visualize and compare

255 the temporal kinetics of saliva and serum antigen-specific IgG, IgA, and IgM responses among  
256 individuals with RT-PCR confirmed prior SARS-CoV-2 infection post symptom onset.

257

## 258 **Results**

### 259 *Saliva and serum samples*

260 A total of 33 saliva samples and 206 serum samples were collected from 33 and 59  
261 individuals, respectively, with RT-PCR confirmed prior SARS-CoV-2 infection (**Table 2**).  
262 Information on days post symptom onset was collected for each positive participant. A total of  
263 134 saliva samples (from 2012 to early 2019) and 112 serum samples (from 2016)<sup>37</sup> were  
264 collected from participants enrolled in cohort studies prior to the start of the COVID-19  
265 pandemic and were designated as negative samples (pre-COVID-19 pandemic) (**Table 2**).

266

### 267 *SARS-CoV-2 antigen-specific IgG, IgA, and IgM cut-off values*

268 The multiplex immunoassay, comprised of ten SARS-CoV-2 antigens (2 N proteins, 1  
269 ECD protein, four RBD proteins, two S1 subunits, and one S2 subunit), one SARS-CoV-1  
270 antigen (NAC SARS CoV 2002 N), and one hCoV-229E antigen (Sino Biol. hCoV 229E ECD)  
271 was used to test a total of 167 saliva samples from 150 individuals and 324 serum samples from  
272 171 individuals. The range, median, mean, standard deviation, and derived MFI cut off value for  
273 each saliva and serum SARS-CoV-2 antigen-specific IgG, IgA, and IgM stratified by negative  
274 samples, samples collected <10 days, and  $\geq 10$  days post SARS-CoV-2 symptom onset are  
275 provided in **Supplementary Table 1** and **Supplementary Table 2**. Saliva collected at  $\geq 10$  days  
276 post symptom onset had significantly elevated IgG levels (median MFI) against all SARS-CoV-2  
277 antigens compared to negative saliva samples (**Supplementary Table 1**). Serum collected at  $\geq 10$

278 days post symptom onset had significantly elevated IgG, IgA, and IgM levels (median MFI)  
279 against all SARS-CoV-2 antigens compared to negative sera.

280

### 281 *Correlation between saliva and serum SARS-CoV-2-specific IgG*

282 Twenty-eight participants provided matched saliva and serum samples that were collected  
283 during the same visit (n=6 negative and n=22 RT-PCR confirmed SARS-CoV-2 infection  
284 matched saliva and serum samples). Antigen-specific IgG levels in matched saliva and serum  
285 samples were significantly correlated for all SARS-CoV-2 and SARS-CoV-1 antigens (**Figure**  
286 **1**). Antigen-specific IgA in matched saliva and serum samples were modestly correlated with  
287 significance detected only for a subset of antigens: GenScript N, Sino Biol. N, Sino Biol. ECD,  
288 GenScript S1, and NAC SARS 2002 N (**Figure 2**). Antigen-specific IgM in matched saliva and  
289 serum samples were also significantly correlated for all SARS-CoV-2 and SARS-CoV-1  
290 antigens, although the correlation was weaker than for IgG (**Figure 3**).

291

### 292 *Saliva: Sensitivity and specificity*

293 In saliva, the sensitivity to detect SARS-CoV-2 infection increased among saliva samples  
294 collected  $\geq 10$  days post symptom onset compared to those collected  $< 10$  days post symptom  
295 onset, for all isotypes (IgG, IgA, and IgM)(**Figure 4**). The highest sensitivity (100%) was  
296 achieved with GenScript N-coupled beads in saliva samples collected  $\geq 10$  days post symptom  
297 onset. All (28/28) individuals with RT-PCR confirmed prior SARS-CoV-2 infection had salivary  
298 anti-GenScript N IgG levels above the cut-off (**Figure 4**). Specificity to classify negative saliva  
299 samples correctly ranged from 98% to 100% for SARS-CoV-2 IgG. Mt. Sinai's RBD resulted in  
300 the highest specificity (100%). All (134/134) negative saliva samples resulted in MFI values

301 below the cut-off (mean + 3 SD) for anti-Mt. Sinai RBD IgG levels. The highest combined  
302 sensitivity and specificity was achieved with GenScript N (100% sensitivity and 99% specificity  
303 at  $\geq 10$  days post symptom onset).

304 While IgA and IgM against SARS-CoV-2 also remained equivalent or increased among  
305 saliva samples collected  $\geq 10$  days compared to  $< 10$  days post symptom onset, the sensitivity to  
306 detect prior SARS-CoV-2 infection remained low (**Figure 4**). For SARS-CoV-2 specific IgA,  
307 sensitivity ranged from 4% with NAC S2 to 61% with Sino Biol. ECD. For IgM, sensitivity  
308 ranged from 0% with NAC S2 to 65% with GenScript S1. Specificity for IgA ranged from 42%  
309 with GenScript S1 to 100% with NAC S1 and S2. The highest combined sensitivity and  
310 specificity for IgA was obtained with Sino Biol. ECD (61% sensitivity  $\geq 10$  days post symptom  
311 onset and 96% specificity). For IgM, specificity ranged from 96% (GenScript RBD [i]) to 99%  
312 (Sino Biol. ECD, GenScript S1, and NAC S2). The highest combined sensitivity and specificity  
313 for IgM was reached with GenScript S1 (65% sensitivity, 99% specificity).

314

#### 315 *Serum: Sensitivity and specificity*

316 In serum, the sensitivity to detect SARS-CoV-2 infection improved among serum  
317 samples collected  $\geq 10$  days compared to  $< 10$  days post symptom onset, for all isotypes (IgG,  
318 IgA, and IgM)(**Figure 5**). For anti-SARS-CoV-2 IgG, the highest sensitivity (92%) achieved  
319 with Mt. Sinai and Sino Biol. RBD using sera collected  $\geq 10$  days post symptom onset (96/104  
320 samples from individuals with RT-PCR confirmed prior SARS-CoV-2 infection had IgG levels  
321 against these antigens above the cut-offs) (**Figure 5**). Specificity ranged from 96%-99% for anti-  
322 SARS-CoV-2 IgG. The highest combined sensitivity and specificity was achieved with Mt.  
323 Sinai's RBD (92% sensitivity and 99% specificity at  $\geq 10$  days post symptom onset)



324 For anti-SARS-CoV-2 IgA and IgM, sensitivity ranged from 0% to 45% when using  
325 serum samples collected <10 days post-COVID-19 symptom onset; sensitivity was higher  
326 overall when detecting IgA compared to IgM. The sensitivity improved significantly with several  
327 antigens (predominantly RBD), when samples collected  $\geq 10$  days post-COVID-19 symptom  
328 onset were tested (**Figure 5**). When testing these sera, the highest sensitivity to detect IgA was  
329 reached using GenScript RBD (h) antigen (95%; 99/104 samples above the cutoff) but several  
330 additional antigens also performed with high sensitivity. In contrast, only two antigens (Mt. Sinai  
331 RBD and GenScript RBD [h]) in the assay reached sensitivities above 90% when detecting anti-  
332 SARS-CoV-2 IgM. Specificity ranged from 96%-99% for both anti-SARS-CoV-2 IgA and IgM.  
333 The highest combined sensitivity and specificity for detecting IgA and IgM was reached using  
334 Mt. Sinai's RBD (as was the case for serum IgG) but also when using NAC's SARS 2002 N  
335 antigen (**Figure 5**).

336

337 *Temporal kinetics of SARS-CoV-2 specific IgG, IgA, and IgM responses in serum compared to*  
338 *saliva*

339 The temporal kinetics of antigen-specific IgG, IgA, and IgM responses in serum and in  
340 saliva are shown in **Figure 6**. Also shown are the cut-offs for each isotype (IgG, IgA, and IgM)  
341 in serum and in saliva (dashed lines). The temporal kinetics and magnitude of the antigen-  
342 specific IgG and IgA responses in saliva generally correlate with those detected in serum. The  
343 IgM response is significantly lower in magnitude (MFIs) in saliva compared to serum, which is  
344 expected and consistent with the lower relative concentration of total IgM in saliva compared to  
345 total IgA and IgG concentrations in saliva.

346 In serum, the SARS-CoV-specific IgA levels across individuals consistently cross the  
347 cut-off (dashed lines), thus indicating seroconversion, several days before IgG and IgM. IgG and  
348 IgM seroconversion in serum seem to occur approximately at the same time.

349 Even though saliva IgA levels increase closely after IgG levels, the SARS-CoV-2-  
350 specific IgA response often does not cross the cut-off, indicative of the low observed sensitivity.  
351 IgM levels in saliva are low and LOESS regression lines generally remain under the cut-off for  
352 most antigens in the multiplex assay. However, in saliva, the antigen-specific IgG response  
353 consistently crosses the cut-off around 10 days post symptom onset, i.e. approximately 15 days  
354 post infection, similar, to the time of IgG seroconversion in serum. The anti-SARS-CoV-2 IgG  
355 response in saliva thus appears to mimic seroconversion in serum.

356

357 *Reactivity of antibodies with SARS-CoV-1 and hCoV proteins following SARS-CoV-2 infection*

358 We sought to evaluate reactivity of SARS-CoV-1 and hCoV proteins in samples from  
359 COVID-19 cases. For IgG, all convalescent phase saliva from COVID-19 cases (28/28; 100%)  
360 reacted with the NAC SARS 2002 N protein. Similarly, 89% and 95% of convalescent sera from  
361 COVID-19 cases reacted with the NAC SARS 2002 N protein for IgG and IgA, respectively.  
362 The median MFI for salivary IgG and IgA, and serum IgG, IgA, and IgM, to NAC SARS 2002 N  
363 was significantly elevated among samples collected  $\geq 10$  days post symptom onset compared to  
364 negatives (**Supplementary Table 1 and Supplementary Table 2**). The median MFI for saliva  
365 and serum IgG and IgA to Sino Biol. hCoV 229E ECD was also elevated among samples  
366 collected  $\geq 10$  days post symptom onset compared to negatives (**Supplementary Table 1 and**  
367 **Supplementary Table 2**). These results suggest that SARS-CoV-2 elicits cross-reactive

368 antibodies to the closely related SARS-CoV-1, and that reactivity to Sino Biol. hCoV 229E ECD  
369 is very common in our study population, likely due to frequent human exposure to hCoVs.

370

### 371 *Intra- and inter-assay variability*

372 Among 47 saliva samples assayed in duplicate on the same 96-well plate, the average  
373 intra-assay variability ranged from 3%-18% (CV%) (**Supplementary Table 3**). Among 47 saliva  
374 samples tested in duplicate on different 96-well plates on different days, the average inter-assay  
375 variability ranged from 5%-28% (CV%) (**Supplementary Table 3**).

376

## 377 **Discussion**

378 Our results demonstrate that salivary SARS-CoV-2-specific IgG detection reflects the  
379 binding profile observed in serum. Salivary SARS-CoV-2-specific IgG can be used to detect a  
380 prior SARS-CoV-2 infection with high sensitivity and specificity. When saliva was collected  
381  $\geq 10$  days post symptom onset, the anti-SARS-CoV-2 IgG assay detects SARS-CoV-2 infection  
382 with 100% sensitivity and 99% specificity (GenScript N) and/or with 89% sensitivity and 100%  
383 specificity (Mt. Sinai RBD). In addition, we demonstrate that the temporal kinetics of SARS-  
384 CoV-2-specific IgG responses in saliva are consistent with those observed in serum and indicate  
385 that most individuals seroconvert approximately 10 days after COVID-19 symptom onset or  
386 approximately two weeks post-presumed infection. Based on these results it is feasible to  
387 accurately measure the salivary IgG response to identify individuals with a prior SARS-CoV-2  
388 infection. Our saliva-based multiplex immunoassay could serve as a non-invasive approach for  
389 accurate and large-scale SARS-CoV-2 “sero”-surveillance. Because saliva samples can be self-  
390 collected and mailed at ambient temperatures,<sup>24</sup> a saliva antibody test could greatly increase the

391 scale of testing—particularly among susceptible populations—compared to blood, and could  
392 clarify population immunity and susceptibility to SARS-CoV-2.

393 Matched saliva and serum samples demonstrate a significant correlation in SARS-CoV-2  
394 antigen-specific IgG responses. An analysis of temporal kinetics of antibody responses in saliva  
395 following COVID-19 symptom onset revealed a congruence with those observed in serum, and a  
396 synchronous elevation of SARS-CoV-2 serum IgG and IgM responses, which has been reported  
397 in serum.<sup>14,29-32</sup> In both saliva and serum, IgG rather than IgM was the first isotype to increase,  
398 mimicking a response consistent with the stimulation of existing, cross-reactive B cells, even  
399 though this is a novel coronavirus in these human populations. Both synchronous and classical  
400 antibody isotype responses have been previously reported following SARS-CoV-2 infection.<sup>14,29-</sup>  
401 <sup>32</sup> Furthermore, IgG levels in saliva and serum tended to rise and cross the cut-off around day 10  
402 post-COVID-19 symptoms onset, which is typically when individuals seek care from a  
403 healthcare provider for the first time. Therefore, salivary antibody testing could be used in  
404 combination with standard SARS-CoV-2 nucleic acid diagnostic testing to provide critical  
405 information about antibody positivity and temporal kinetics, which can be informative for patient  
406 trajectories and outcomes.

407 The sensitivity of our assay improved or remained the same among saliva and serum  
408 samples collected during convalescent phase ( $\geq 10$  days post symptom onset) compared to acute  
409 phase ( $< 10$  days post symptom onset) for all SARS-CoV-2 antigen-specific IgG, IgA, and IgM.  
410 Saliva SARS-CoV-2 antigen-specific IgG peaked at 100% sensitivity, and serum SARS-CoV-2  
411 antigen-specific IgG at 92% sensitivity (anti-Sino Biol. RBD IgG and anti-Mt. Sinai RBD IgG,  
412 respectively) among samples collected  $\geq 10$  days post SARS-CoV-2 symptom onset. Earlier

413 studies have reported sensitivities for various SARS-CoV-2 IgG tests peaking at 82%-100%  
414 sensitivity among samples collected during convalescent phase of infection.<sup>33-35</sup>

415 While serum IgA and IgM peaked at 95% and 93% sensitivity, respectively, at  $\geq 10$  days  
416 post symptom onset, saliva IgA and IgM reached a sensitivity of only 61% and 65%,  
417 respectively. The median MFI for most SARS-CoV-2 antigen-specific IgA and IgM responses in  
418 saliva were, however, significantly elevated at  $\geq 10$  days post symptom onset compared to  
419 negative control samples (**Supplementary Table 1**). One explanation for the low sensitivity  
420 observed in saliva for IgA and IgM may be due to the background signal-to-noise ratio for saliva  
421 SARS-CoV-2 antigen-specific IgA and IgM, which was greater than that observed for saliva  
422 IgG. Non-specific binding of salivary proteins, exogenous particles, non-specific antibodies, or  
423 cross-reactivity with other viruses could contribute to this background. Although we harvested  
424 GCF, which is enriched with blood transudate, because of size exclusion IgM antibodies are not  
425 abundant in saliva (12). Nevertheless, SARS-CoV-2 antigen-specific IgG responses in saliva  
426 performed with improved sensitivity and specificity compared to serum, peaking at 100%  
427 sensitivity  $\geq 10$  days post symptom onset for anti-GenScript N IgG and 100% specificity for anti-  
428 Mt. Sinai RBD IgG.

429 Virus infections often induce antibody responses that cross-react with related viruses,  
430 which can compromise the performance of serologic assays. Cross-reactivity may largely be  
431 attributable to the N protein and S2 subunit, which share 90% sequence homology with SARS-  
432 CoV-1.<sup>31</sup> The RBD of the S protein is less conserved across beta-CoVs than the N protein and  
433 whole S protein, and many antibodies known to interact with SARS-CoV-1's RBD do not  
434 interact with SARS-CoV-2's RBD.<sup>38</sup> For these reasons, we hypothesized that SARS-CoV-2 N  
435 would be highly sensitive and cross-react with antibodies following SARS-CoV-1 infection,

436 whereas those against SARS-CoV-2 RBD would be more specific.<sup>36</sup> We found that all (28/28;  
437 100%) saliva samples from COVID-19 cases collected at  $\geq 10$  days post-symptom onset reacted  
438 with NAC SARS 2002 N in the IgG assay, indicating that SARS-CoV-2 infection can elicit  
439 cross-reactive IgG to closely related CoVs. Of course, this antigen could still be used for SARS-  
440 CoV-2 diagnostics, as the cross-reactivity would only be relevant if SARS-CoV-1 and SARS-  
441 CoV-2 were co-circulating in the same human population. We did not specifically evaluate  
442 whether common hCoVs elicit cross-reactive antibodies that could cause false positive results in  
443 our SARS-CoV-2 assay; however, we did include one hCoV antigen (hCoV-229E ECD) in the  
444 panel. Sera from early and late COVID-19 cases and negative control samples all reacted  
445 similarly to this antigen, which is consistent with a high prevalence of hCoV exposure in the  
446 general population.<sup>39-41</sup> This also strongly suggests that our negative control sample population  
447 was highly exposed to hCoV and we would not have been able to achieve such clear  
448 discrimination between negative control and COVID-19 samples with other antigens in the  
449 multiplex panel if cross-reactivity was a significant issue.

450         This study has several limitations. First, our collection of saliva and serum samples was  
451 predominantly obtained from independent cohorts, and it contained 28 matched saliva and serum  
452 samples collected from the same participants at the same time. In future studies, the performance  
453 of this assay should be compared between saliva and serum in a large sample of matched saliva  
454 and serum samples. Second, all saliva data was cross sectional and we were not able to evaluate  
455 the temporal kinetics of saliva SARS-CoV-2 antibody responses using repeated measures within  
456 the same individual. Longitudinal analysis would allow us to evaluate the temporal kinetics and  
457 magnitude of SARS-CoV-2 IgG, IgA, and IgM responses, resolve synchronous vs. classical  
458 isotype responses (IgM followed by IgA followed by IgG) following SARS-CoV-2 infection.<sup>42</sup>

459 Additional investigation with convalescent phase saliva and sera are needed to determine the  
460 stability of SARS-CoV-2-specific IgG responses. Third, we did not have information on severity  
461 of SARS-CoV-2 disease from each participant in this study, and thus were not able to determine  
462 the impact of severity of infection on antibody responses.<sup>29</sup> Prior studies suggest that antibody  
463 responses are slightly elevated among individuals with severe infection.<sup>29,30,42</sup> Future analysis  
464 should determine how severity of infection, and infectious dose, modifies antibody responses.  
465 Fourth, we did not determine receiver operating characteristic (ROC)-optimized MFI cut offs in  
466 this analysis. However, the cut offs used in this study (average of negatives + three standard  
467 deviations) are conservative. Future analysis should identify ROC-optimized cut offs, which  
468 could improve the sensitivity and specificity of this saliva assay. Lastly, we did not have  
469 sociodemographic and medical history information for participants, and thus were not able to  
470 evaluate the relationship of age, sex, and other factors on antibody responses.

471 In future analysis, additional replicates should be used to assess intra- and inter-assay  
472 variability, and a lower limit of detection should be determined for each antigen. Furthermore,  
473 well characterized sera from other hCoV and zoonotic CoV infections should be used to address  
474 potential cross-reactivity of antibodies following SARS-CoV-1, MERS-CoV, hCoV-OC43,  
475 hCoV-HKU1, hCoV-229E, and hCoV-NL63 infection with SARS-CoV-2 proteins. Lastly, the  
476 performance of this saliva assay should be compared head-to-head with other clinically utilized  
477 antibody tests.

478 Saliva represents a practical, non-invasive alternative to NP, OP, blood, and stool-based  
479 diagnostic specimens for COVID-19 diagnostic testing. Recently, saliva collection via passive  
480 drool (instructing patients to spit into a sterile urine specimen collection cup) was shown to be  
481 more sensitive than NP specimens for SARS-CoV-2 RNA detection by RT-PCR in COVID-19

482 patients.<sup>26</sup> Furthermore, the U.S. Food and Drug Administration recently granted emergency use  
483 authorization for a saliva-based nucleic acid test for SARS-CoV-2 that can be collected at home  
484 and mailed in for testing.<sup>43</sup> Recognition of the advantages of saliva both for SARS-CoV-2  
485 nucleic acid and antibody testing could accelerate goals for nationwide testing to surveil active  
486 and prior SARS-CoV-2 infections at the general population level.

487         This study demonstrates that SARS-CoV-2 antigen-specific antibody responses in saliva  
488 reflect those observed in serum, and that SARS-CoV-2 antigen-specific IgG can be used to  
489 accurately detect prior SARS-CoV-2 infection. We have developed and validated a saliva-based  
490 multiplex immunoassay and identified SARS-CoV-2 antigen-specific IgG responses that can  
491 detect prior SARS-CoV-2 infection with high sensitivity (anti-N IgG; 100% sensitivity, 99%  
492 specificity) and specificity (anti-RBD IgG; 89% sensitivity, 100% specificity) at  $\geq 10$  days post  
493 symptom onset. An accurate saliva-based antibody test for prior SARS-CoV-2 infection would  
494 greatly improve our ability to perform public health interventions in the current pandemic. This  
495 non-invasive method for comprehensive determination of prior SARS-CoV-2 infection will  
496 facilitate large-scale “sero”-surveillance to evaluate population immunity. As SARS-CoV-2  
497 vaccine candidates progress through clinical trials, such non-invasive tests will be critical to  
498 identify immunity gaps and susceptible populations to inform targeted vaccination efforts, as  
499 well as companion diagnostics for vaccine trials.<sup>44</sup> Furthermore, saliva assays can be used to  
500 monitor correlates of protection and the force of transmission in community-based settings, pre-  
501 and post- vaccination/prevention strategies, to determine the effectiveness of population-based  
502 interventions and direct future preventative strategies.

503



504 **References**

- 505 1. Dong, E., Du, H. & Gardner, L. An interactive web-based dashboard to track COVID-19  
506 in real time. *The Lancet Infectious Diseases* **20**, 533-534 (2020).
- 507 2. Angulo, F.J., Finelli, L. & Swerdlow, D.L. Reopening Society and the Need for Real-  
508 Time Assessment of COVID-19 at the Community Level. *JAMA* (2020).
- 509 3. Gronvall, G., *et al.* Developing a National Strategy for Serology ( Antibody Testing ) in  
510 the United States. *Johns Hopkins - Bloomberg School of Public Health* (2020).
- 511 4. Bendavid, E., *et al.* COVID-19 Antibody Seroprevalence in Santa Clara County,  
512 California. *medRxiv*, 2020.2004.2014.20062463-  
513 20062020.20062404.20062414.20062463 (2020).
- 514 5. Sood, N., *et al.* Seroprevalence of SARS-CoV-2-Specific Antibodies Among Adults in  
515 Los Angeles County, California, on April 10-11, 2020. *JAMA* (2020).
- 516 6. Cuomo Says 21% of Those Tested in N.Y.C. Had Virus Antibodies. (2020).
- 517 7. Zorzoli, M. ESCLUSIVA I nuovi dati di Robbio, unico paese italiano a fare il test  
518 sull'immunità a tutti i cittadini. 70% di asintomatici. (2020).
- 519 8. Regalado, A. Blood tests show 14% of people are now immune to covid-19 in one town  
520 in Germany. (2020).
- 521 9. Dyal, J.W., *et al.* COVID-19 Among Workers in Meat and Poultry Processing Facilities -  
522 19 States, April 2020. *MMWR. Morbidity and mortality weekly report* **69**(2020).
- 523 10. Lloyd-Sherlock, P., Ebrahim, S., Geffen, L. & McKee, M. Bearing the brunt of covid-19:  
524 older people in low and middle income countries. *BMJ* **368**, m1052 (2020).
- 525 11. Ward, C.F., Figiel, G.S. & McDonald, W.M. Altered Mental Status as a Novel Initial  
526 Clinical Presentation for COVID-19 Infection in the Elderly. *The American journal of*

- 527            *geriatric psychiatry : official journal of the American Association for Geriatric*  
528            *Psychiatry* (2020).
- 529    12.    Yang, Y., *et al.* Mental health services for older adults in China during the COVID-19  
530            outbreak. *The lancet. Psychiatry* **7**, e19 (2020).
- 531    13.    Chandrashekar, A., *et al.* SARS-CoV-2 infection protects against rechallenge in rhesus  
532            macaques. *Science*, eabc4776-eabc4776 (2020).
- 533    14.    Wajnberg, A., *et al.* Humoral immune response and prolonged PCR positivity in a cohort  
534            of 1343 SARS-CoV 2 patients in the New York City region. (2020).
- 535    15.    Augustine, S.A.J., *et al.* Developing a Salivary Antibody Multiplex Immunoassay to  
536            Measure Human Exposure to Environmental Pathogens. *Journal of Visualized*  
537            *Experiments*, 1-7 (2016).
- 538    16.    Augustine, S.A.J., *et al.* Immunoprevalence to Six Waterborne Pathogens in Beachgoers  
539            at Boqueron Beach, Puerto Rico: Application of a Microsphere-Based Salivary Antibody  
540            Multiplex Immunoassay. *Front Public Health* **5**, 84 (2017).
- 541    17.    Brandtzaeg, P. Do salivary antibodies reliably reflect both mucosal and systemic  
542            immunity? *Annals of the New York Academy of Sciences* **1098**, 288-311 (2007).
- 543    18.    Brandtzaeg, P. Secretory immunity with special reference to the oral cavity. *Journal of*  
544            *Oral Microbiology* **5**, 1-24 (2013).
- 545    19.    Griffin, S.M., Chen, I.M., Fout, G.S., Wade, T.J. & Egorov, A.I. Development of a  
546            multiplex microsphere immunoassay for the quantitation of salivary antibody responses  
547            to selected waterborne pathogens. *J Immunol Methods* **364**, 83-93 (2011).

- 548 20. Griffin, S.M., *et al.* Application of salivary antibody immunoassays for the detection of  
549 incident infections with Norwalk virus in a group of volunteers. *J Immunol Methods* **424**,  
550 53-63 (2015).
- 551 21. Pisanic, N., *et al.* Minimally invasive saliva testing to monitor norovirus infection in  
552 community settings. *Journal of Infectious Diseases* **219**, 1234-1242 (2019).
- 553 22. Pisanic, N., *et al.* Development of an oral fluid immunoassay to assess past and recent  
554 hepatitis E virus (HEV) infection. *Journal of Immunological Methods* **448**, 1-8 (2017).
- 555 23. L.G, W., *et al.* Post-marketing surveillance of OraQuick whole blood and oral fluid rapid  
556 HIV testing. *Aids* **20**, 1661-1666 (2006).
- 557 24. Morris-Cunnington, M.C., Edmunds, W.J., Miller, E. & Brown, D.W.G. A population-  
558 based seroprevalence study of hepatitis A virus using oral fluid in England and Wales.  
559 *American Journal of Epidemiology* **159**, 786-794 (2004).
- 560 25. Lourenco, J., *et al.* Fundamental principles of epidemic spread highlight the immediate  
561 need for large-scale serological surveys to assess the stage of the SARS-CoV-2 epidemic.  
562 *medRxiv*, 2020.2003.2024.20042291-20042020.20042203.20042224.20042291 (2020).
- 563 26. Wyllie, A.L., *et al.* Saliva is more sensitive for SARS-CoV-2 detection in COVID-19  
564 patients than nasopharyngeal swabs. *medRxiv*, 2020.2004.2016.20067835-  
565 20062020.20067804.20067816.20067835 (2020).
- 566 27. Sullivan, P.S., *et al.* Detection of SARS-CoV-2 RNA and Antibodies in Diverse Samples:  
567 Protocol to Validate the Sufficiency of Provider-Observed, Home-Collected Blood,  
568 Saliva, and Oropharyngeal Samples. *JMIR public health and surveillance* **6**, e19054  
569 (2020).

- 570 28. To, K.K., *et al.* Temporal profiles of viral load in posterior oropharyngeal saliva samples  
571 and serum antibody responses during infection by SARS-CoV-2: an observational cohort  
572 study. *Lancet Infect Dis* **20**, 565-574 (2020).
- 573 29. Cervia, C., *et al.* Systemic and mucosal antibody secretion specific to SARS-CoV-2  
574 during mild versus severe COVID-19. *bioRxiv*, 2020.2005.2021.108308 (2020).
- 575 30. Guo, L., *et al.* Profiling Early Humoral Response to Diagnose Novel Coronavirus Disease  
576 (COVID-19). *Clinical Infectious Diseases* (2020).
- 577 31. Okba, N.M.A., *et al.* Severe Acute Respiratory Syndrome Coronavirus 2–Specific  
578 Antibody Responses in Coronavirus Disease 2019 Patients. *Emerging Infectious Diseases*  
579 **26**(2020).
- 580 32. Zhao, J., *et al.* Antibody responses to SARS-CoV-2 in patients of novel coronavirus  
581 disease 2019. *Clinical Infectious Diseases* (2020).
- 582 33. Lassaunière, R., *et al.* Evaluation of nine commercial SARS-CoV-2 immunoassays.  
583 *medRxiv*, 2020.2004.2009.20056325-20052020.20056304.20056309.20056325 (2020).
- 584 34. Whitman, J.D., *et al.* Test performance evaluation of SARS-CoV-2 serological assays.  
585 (2020).
- 586 35. Adams, E.R., *et al.* Antibody testing for COVID-19: A report from the National COVID  
587 Scientific Advisory Panel. *medRxiv*, 2020.2004.2015.20066407 (2020).
- 588 36. Amanat, F., *et al.* A serological assay to detect SARS-CoV-2 seroconversion in humans.  
589 *medRxiv* **2**, 2020.2003.2017.20037713-20032020.20037703.20037717.20037713 (2020).
- 590 37. Kelen, G.D., *et al.* Improvements in the continuum of HIV care in an inner-city  
591 emergency department. *AIDS* **30**, 113-120 (2016).

- 592 38. Tian, X., *et al.* Potent binding of 2019 novel coronavirus spike protein by a SARS  
593 coronavirus-specific human monoclonal antibody. *Emerging Microbes & Infections* **9**,  
594 382-385 (2020).
- 595 39. Monto, A.S. & Lim, S.K. The Tecumseh study of respiratory illness. VI. Frequency of  
596 and relationship between outbreaks of coronavirus infection. *J Infect Dis* **129**, 271-276  
597 (1974).
- 598 40. Severance, E.G., *et al.* Development of a nucleocapsid-based human coronavirus  
599 immunoassay and estimates of individuals exposed to coronavirus in a U.S. metropolitan  
600 population. *Clinical and vaccine immunology : CVI* **15**, 1805-1810 (2008).
- 601 41. Gorse, G.J., Patel, G.B., Vitale, J.N. & O'Connor, T.Z. Prevalence of antibodies to four  
602 human coronaviruses is lower in nasal secretions than in serum. *Clinical and vaccine*  
603 *immunology : CVI* **17**, 1875-1880 (2010).
- 604 42. Long, Q.-X., *et al.* Antibody responses to SARS-CoV-2 in patients with COVID-19.  
605 *Nature Medicine* (2020).
- 606 43. FDA. ACCELERATED EMERGENCY USE AUTHORIZATION (EUA) SUMMARY  
607 SARS-CoV-2 ASSAY (Rutgers Clinical Genomics Laboratory). Vol. 2020 (US Food and Drug  
608 Administration, 2020).
- 609 44. Lipsitch, M., Kahn, R. & Mina, M.J. Antibody testing will enhance the power and  
610 accuracy of COVID-19-prevention trials. *Nature Medicine* (2020).

612 **Table 1.** Antigens and antibodies used to develop the multiplex bead-based assay.

| <u>Source*</u> | <u>Pathogen</u> | <u>Antigen<sup>#</sup></u> | <u>Tag</u> | <u>Antibody<sup>^</sup></u> | <u>Abbreviation</u>      | <u>Antigen Catalog No.</u> | <u>Antibody Catalog No.</u> |
|----------------|-----------------|----------------------------|------------|-----------------------------|--------------------------|----------------------------|-----------------------------|
| GenScript      |                 | N                          | his        | anti-Gen N                  | GenScript N              | Z03480                     | A02039                      |
| Sino Biol.     |                 | N                          | his        | anti-Sino N                 | Sino Biol. N             | 40588-V08B                 | A02039                      |
| Sino Biol.     |                 | ECD (S1+S2)                | his        | anti-Sino RBD               | Sino Biol. ECD (S1+S2)   | 40589-V08B1                | A02038                      |
| Sino Biol.     |                 | RBD                        | his        | anti-Sino RBD               | Sino Biol. RBD           | 40592-V08H                 | 40592-T62                   |
| Mt. Sinai      |                 | RBD                        | his        | anti-Sino RBD               | Mt. Sinai RBD            | <i>Amanat F., et al</i>    | 40592-T62                   |
| GenScript      | SARS-CoV-2      | RBD                        | his        | anti-Sino RBD               | Sino Biol. RBD (h)       | Z03479                     | 40592-T62                   |
| GenScript      |                 | RBD                        | his        | anti-Sino RBD               | Sino Biol. RBD (i)       | Z03483                     | 40592-T62                   |
| GenScript      |                 | S1                         | N/A        | anti-Gen S                  | GenScript S1             | Z03501                     | A02038                      |
| NAC            |                 | S1                         | shFc       | anti-Sheep Fc               | NAC S1                   | REC31806                   | 313-005-046                 |
| NAC            |                 | S2                         | shFc       | anti-Sheep Fc               | NAC S2                   | REC31807                   | 313-005-046                 |
| NAC            | SARS-CoV-1      | SARS CoV N                 | his        | anti-his                    | NAC SARS 2002 N          | REC31744                   | MA121315                    |
| Sino Biol.     | hCoV-229E       | 229E ECD                   | his        | anti-his                    | Sino Biol. hCoV 229E ECD | 40605-V08B                 | MA121315                    |

\*Sino Biol.: Sino Biological; NAC: Native Antigen Company

<sup>#</sup>N: nucleocapsid protein; ECD: ectodomain (S1 + S2 subunit of spike protein); RBD: receptor binding domain

<sup>^</sup>Corresponding IgG antibody used for confirmation

613

614

615 **Table 2.** Saliva and serum samples.

|                                            | <u>Saliva</u>    |                  | <u>Serum</u>     |                  |
|--------------------------------------------|------------------|------------------|------------------|------------------|
|                                            | Participants     | Samples          | Participants     | Samples          |
|                                            | n (%)            | n (%)            | n (%)            | n (%)            |
| <b>All samples</b>                         | <b>150 (100)</b> | <b>167 (100)</b> | <b>171 (100)</b> | <b>324 (100)</b> |
| SARS-CoV-2 PCR positive                    | 33 (22.0)        | 33 (19.8)        | 59 (34.5)        | 206 (63.6)       |
| SARS-CoV-2 PCR negative                    | 117 (78.0)       | 134 (80.2)       | 112 (65.5)       | 118 (36.4)       |
| <b><i>Matched saliva-serum samples</i></b> | <b>28 (100)</b>  | <b>28 (100)</b>  | -                | -                |
| SARS-CoV-2 PCR positive                    | 22 (78.6)        | 22 (78.6)        | -                | -                |
| SARS-CoV-2 PCR negative                    | 6 (21.4)         | 6 (21.4)         | -                | -                |

616

617

618

619

620

621

622

623

624

625

626

627

628

629

630

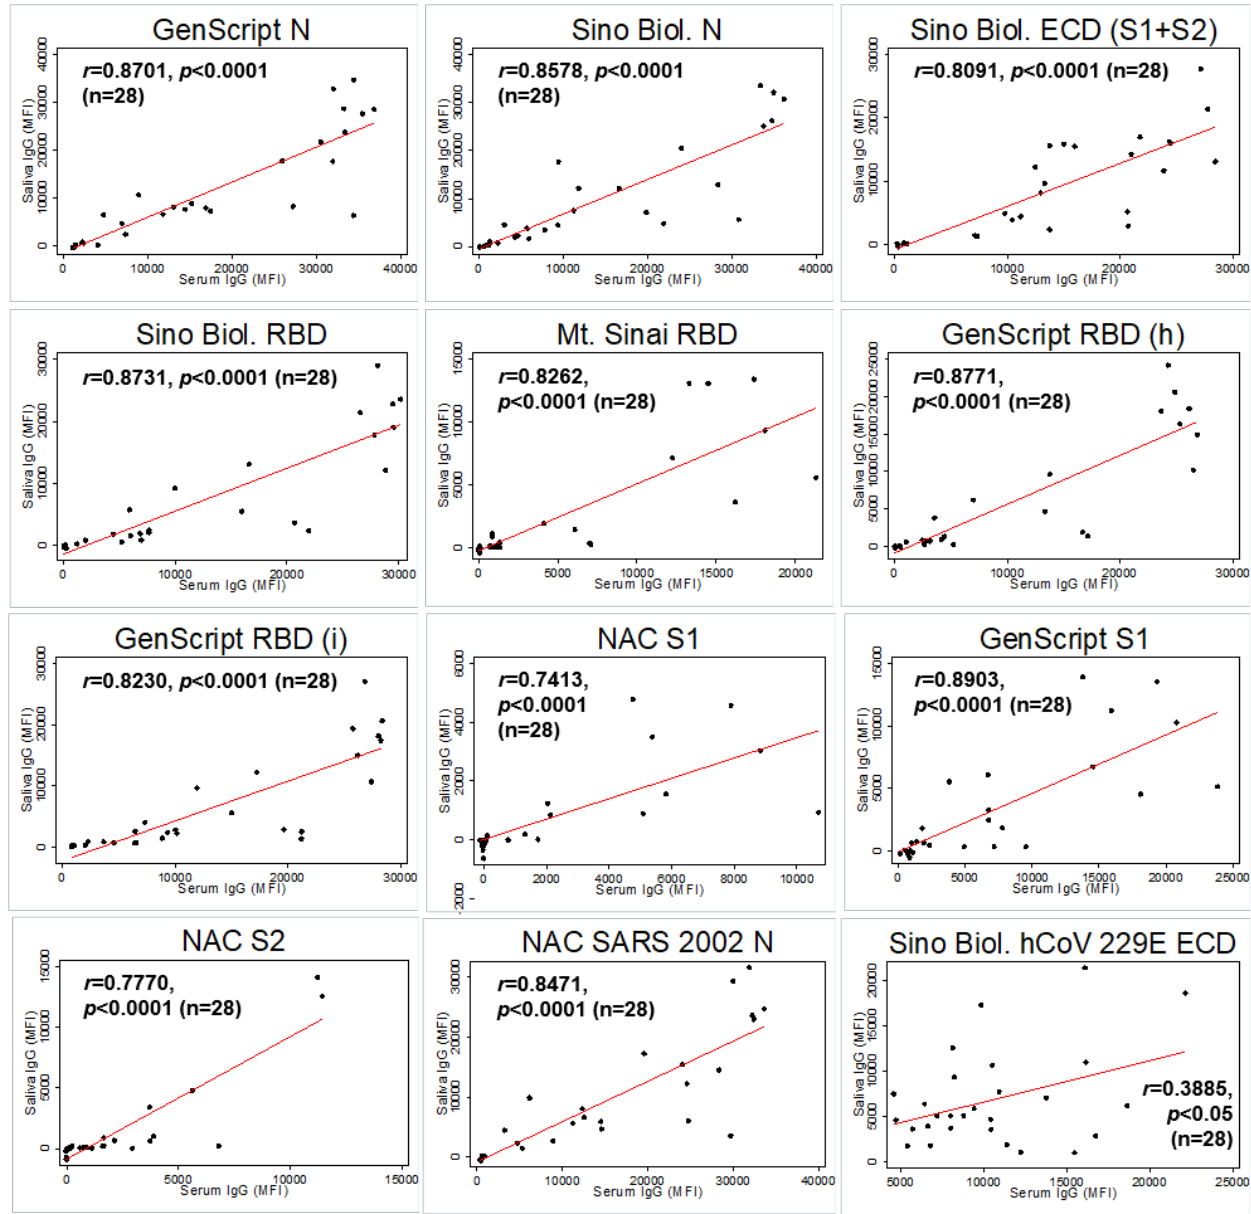



637 subunit+S2 subunit of the spike protein); RBD: receptor binding domain; (h): produced in human  
638 cell; (i): produced in insect cell; MFI=mean fluorescence intensity.

639

640

641

642

643

644

645

646

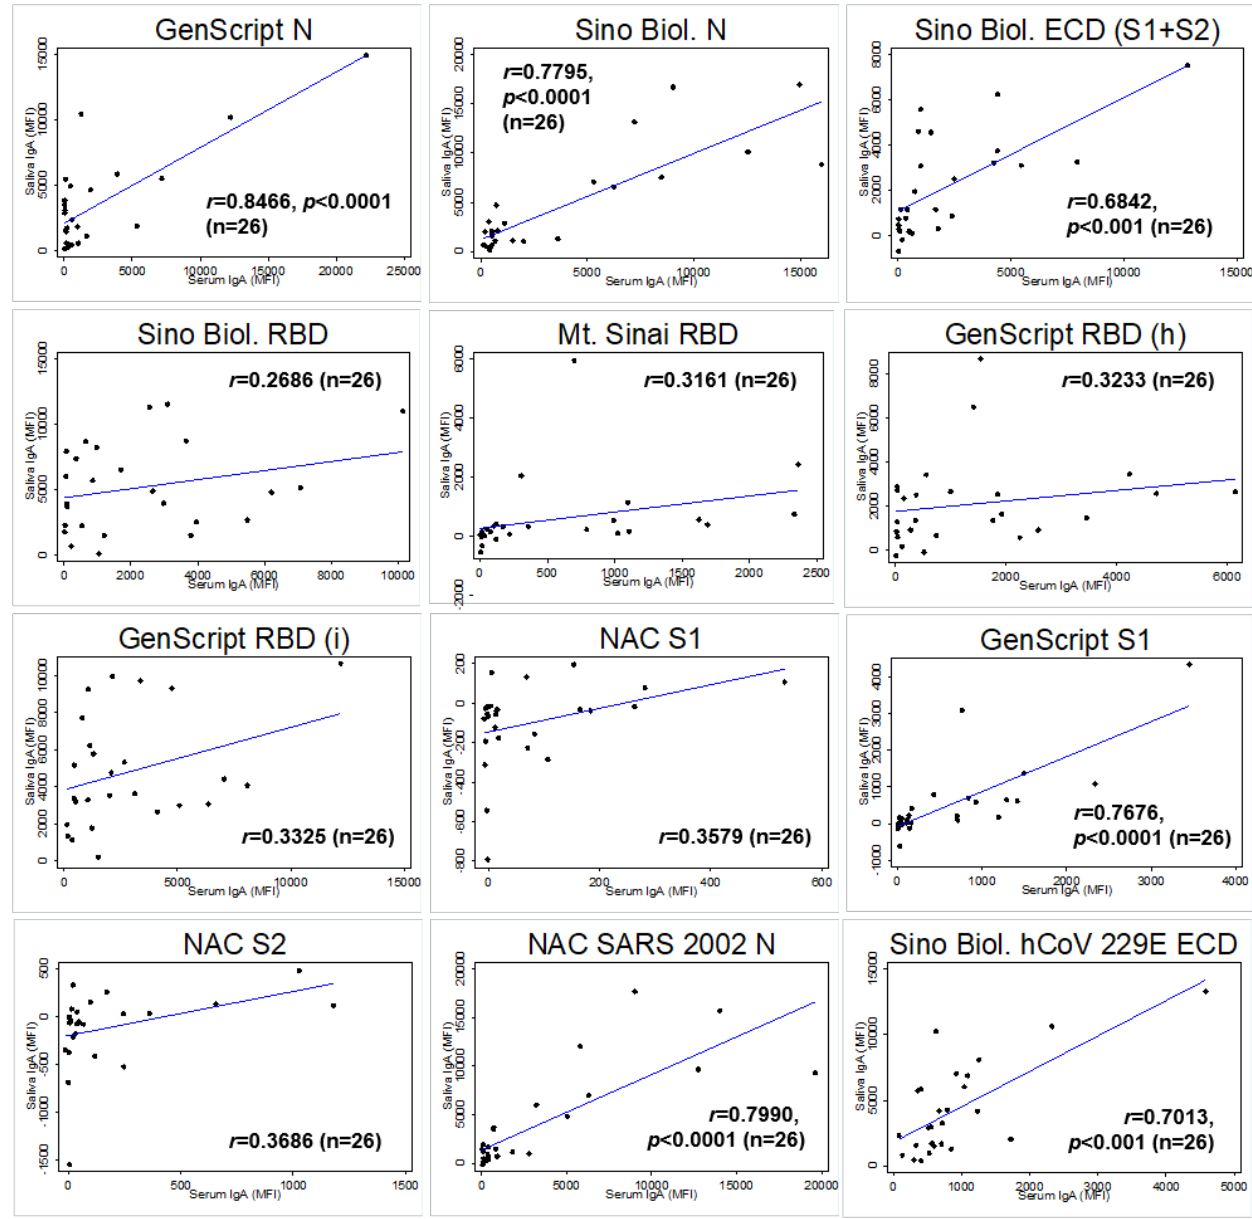

647

648 **Figure 2.** Correlation between saliva and serum SARS-CoV-2 antigen-specific IgA among  
 649 matched saliva and serum samples (n=26). Pearson correlation coefficient is provided for each  
 650 antigen-specific IgA. *p* values are provided for statistically significant correlations only (*p*<0.05).

651 *Note.* Sino Biol.: Sino Biological; NAC: Native Antigen Company; N: nucleocapsid protein;

652 ECD: S1: S1 subunit of spike protein; S2: S2 subunit of spike protein; ectodomain (S1

653 subunit+S2 subunit of the spike protein); RBD: receptor binding domain; (h): produced in human  
654 cell; (i): produced in insect cell; MFI=mean fluorescence intensity.

655

656

657

658

659

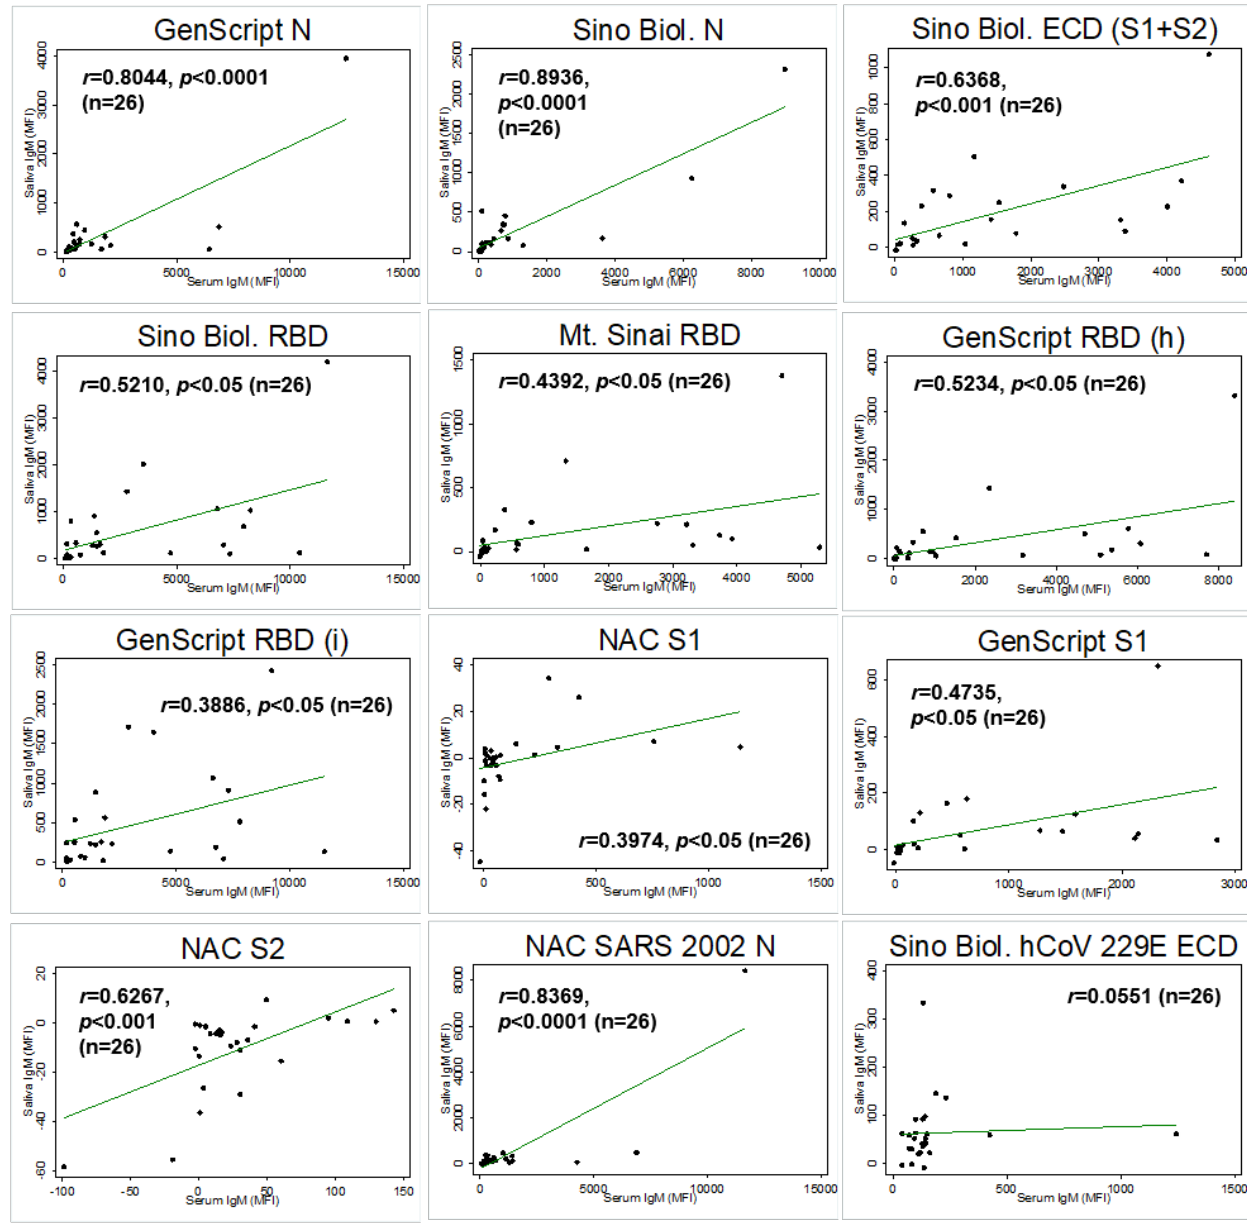

660

661 **Figure 3.** Correlation between saliva and serum SARS-CoV-2 antigen-specific IgM among  
 662 matched saliva and serum samples (n=26). Pearson correlation coefficient is provided for each  
 663 antigen-specific IgM. *p* values are provided for statistically significant correlations only  
 664 ( $p<0.05$ ). *Note.* Sino Biol.: Sino Biological; NAC: Native Antigen Company; N: nucleocapsid  
 665 protein; ECD: S1: S1 subunit of spike protein; S2: S2 subunit of spike protein; ectodomain (S1

666 subunit+S2 subunit of the spike protein); RBD: receptor binding domain; (h): produced in human  
667 cell; (i): produced in insect cell; MFI=mean fluorescence intensity.

668

669

670

671

672

673

674

675

676

677

| Antigen           | IgG |      |      | IgA |      |      | IgM |     |     | Legend |     |     |     |
|-------------------|-----|------|------|-----|------|------|-----|-----|-----|--------|-----|-----|-----|
|                   | Se  | Se   | Sp   | Se  | Se   | Sp   | Se  | Se  | Sp  |        |     |     |     |
| GenScript N       | 40% | 100% | 99%  | 33% | 48%  | 96%  | 0%  | 4%  | 98% | 100%   | 90% | 40% | 20% |
| Sino Biol. N      | 0%  | 89%  | 99%  | 33% | 39%  | 98%  | 0%  | 17% | 98% | 98%    | 88% | 38% | 18% |
| Sino Biol. ECD    | 20% | 96%  | 99%  | 33% | 61%  | 99%  | 0%  | 4%  | 99% | 96%    | 86% | 36% | 16% |
| Sino Biol. RBD    | 20% | 96%  | 99%  | 0%  | 17%  | 99%  | 0%  | 30% | 98% | 94%    | 84% | 34% | 14% |
| Mt. Sinai RBD     | 0%  | 89%  | 100% | 0%  | 26%  | 99%  | 0%  | 35% | 98% | 92%    | 82% | 32% | 12% |
| GenScript RBD (h) | 0%  | 89%  | 99%  | 0%  | 17%  | 99%  | 0%  | 30% | 98% |        |     |     |     |
| GenScript RBD (i) | 0%  | 86%  | 99%  | 0%  | 30%  | 96%  | 0%  | 17% | 96% |        |     |     |     |
| NAC S1            | 0%  | 57%  | 99%  | 0%  | 8.7% | 100% | 0%  | 4%  | 98% |        |     |     |     |
| GenScript S1      | 0%  | 50%  | 98%  | 33% | 44%  | 42%  | 0%  | 65% | 99% |        |     |     |     |
| NAC S2            | 0%  | 43%  | 100% | 0%  | 4%   | 100% | 0%  | 0%  | 99% |        |     |     |     |
| NAC SARS 2002 N   | 20% | 100% | 99%  | 33% | 44%  | 98%  | 0%  | 4%  | 96% |        |     |     |     |

  

|                                                |                                                 |                               |                                                |                                                 |                              |                                                |                                                 |                              |  |  |  |  |
|------------------------------------------------|-------------------------------------------------|-------------------------------|------------------------------------------------|-------------------------------------------------|------------------------------|------------------------------------------------|-------------------------------------------------|------------------------------|--|--|--|--|
| <10 days post symptom onset (n=5) <sup>§</sup> | ≥10 days post symptom onset (n=28) <sup>§</sup> | Negative (n=134) <sup>§</sup> | <10 days post symptom onset (n=3) <sup>§</sup> | ≥10 days post symptom onset (n=23) <sup>§</sup> | Negative (n=83) <sup>§</sup> | <10 days post symptom onset (n=3) <sup>§</sup> | ≥10 days post symptom onset (n=23) <sup>§</sup> | Negative (n=84) <sup>§</sup> |  |  |  |  |
|------------------------------------------------|-------------------------------------------------|-------------------------------|------------------------------------------------|-------------------------------------------------|------------------------------|------------------------------------------------|-------------------------------------------------|------------------------------|--|--|--|--|

<sup>§</sup>Not all samples were tested for all isotypes due to limited saliva volume

678

679

680 **Figure 4.** The sensitivity and specificity of each SARS-CoV-2 antigen-specific IgG, IgA, and  
681 IgM in saliva. Samples collected from individuals with RT-PCR confirmed prior SARS-CoV-2  
682 infection are stratified into samples collected <10 days post symptom onset and samples  
683 collected ≥10 days post symptom onset. The average MFI of negative samples + 3 standard  
684 deviations was used to set the MFI cut off for each SARS-CoV-2 antigen-specific IgG, IgA, and  
685 IgM. Darker shades of green indicate higher whereas darker shades of red indicate lower  
686 sensitivity and specificity. *Note.* Sino Biol.: Sino Biological; NAC: Native Antigen Company; N:  
687 nucleocapsid protein; ECD: S1: S1 subunit of spike protein; S2: S2 subunit of spike protein;  
688 ectodomain (S1 subunit+S2 subunit of the spike protein); RBD: receptor binding domain; (h):

689 produced in human cell; (i): produced in insect cell; Se: Sensitivity; Sp: specificity; MFI=mean  
690 fluorescence intensity.

691

692

693

694

695

696

697

698

699

700

| Antigen           | IgG                                             |                                                  |                               | IgA                                             |                                                  |                               | IgM                                             |                                                  |                               | Legend |     |     |     |
|-------------------|-------------------------------------------------|--------------------------------------------------|-------------------------------|-------------------------------------------------|--------------------------------------------------|-------------------------------|-------------------------------------------------|--------------------------------------------------|-------------------------------|--------|-----|-----|-----|
|                   | Se                                              | Sp                                               | Sp                            | Se                                              | Se                                               | Sp                            | Se                                              | Se                                               | Sp                            |        |     |     |     |
| GenScript N       | 22%                                             | 90%                                              | 97%                           | 42%                                             | 90%                                              | 98%                           | 8%                                              | 37%                                              | 98%                           | 100%   | 90% | 40% | 20% |
| Sino Biol. N      | 15%                                             | 78%                                              | 98%                           | 24%                                             | 76%                                              | 99%                           | 9%                                              | 58%                                              | 99%                           | 98%    | 88% | 38% | 18% |
| Sino Biol. ECD    | 21%                                             | 89%                                              | 96%                           | 36%                                             | 90%                                              | 96%                           | 21%                                             | 82%                                              | 98%                           | 96%    | 86% | 36% | 16% |
| Sino Biol. RBD    | 26%                                             | 92%                                              | 97%                           | 40%                                             | 92%                                              | 98%                           | 21%                                             | 80%                                              | 97%                           | 94%    | 84% | 34% | 14% |
| Mt. Sinai RBD     | 25%                                             | 92%                                              | 99%                           | 40%                                             | 94%                                              | 99%                           | 37%                                             | 93%                                              | 97%                           | 92%    | 82% | 32% | 12% |
| GenScript RBD (h) | 26%                                             | 91%                                              | 96%                           | 45%                                             | 95%                                              | 97%                           | 34%                                             | 93%                                              | 96%                           |        |     |     |     |
| GenScript RBD (i) | 11%                                             | 75%                                              | 98%                           | 35%                                             | 87%                                              | 98%                           | 24%                                             | 85%                                              | 99%                           |        |     |     |     |
| NAC S1            | 12%                                             | 75%                                              | 99%                           | 6%                                              | 52%                                              | 99%                           | 2%                                              | 29%                                              | 97%                           |        |     |     |     |
| GenScript S1      | 1%                                              | 23%                                              | 98%                           | 0%                                              | 15%                                              | 98%                           | 25%                                             | 87%                                              | 98%                           |        |     |     |     |
| NAC S2            | 21%                                             | 80%                                              | 99%                           | 23%                                             | 71%                                              | 99%                           | 4%                                              | 30%                                              | 97%                           |        |     |     |     |
| NAC SARS 2002 N   | 21%                                             | 89%                                              | 96%                           | 46%                                             | 95%                                              | 99%                           | 11%                                             | 51%                                              | 99%                           |        |     |     |     |
|                   | <10 days post symptom onset (n=92) <sup>§</sup> | ≥10 days post symptom onset (n=104) <sup>§</sup> | Negative (n=112) <sup>§</sup> | <10 days post symptom onset (n=92) <sup>§</sup> | ≥10 days post symptom onset (n=104) <sup>§</sup> | Negative (n=106) <sup>§</sup> | <10 days post symptom onset (n=92) <sup>§</sup> | ≥10 days post symptom onset (n=104) <sup>§</sup> | Negative (n=106) <sup>§</sup> |        |     |     |     |

<sup>§</sup>Not all samples were tested for all isotypes due to limited serum volume

701  
702  
703 **Figure 5.** The sensitivity and specificity of each SARS-CoV-2 antigen-specific IgG, IgA, and  
704 IgM in serum. Samples collected from individuals with RT-PCR confirmed prior SARS-CoV-2  
705 infection are stratified into samples collected <10 days post symptom onset and samples  
706 collected ≥10 days post symptom onset. The average MFI of negative samples + 3 standard  
707 deviations was used to set the MFI cut off for each SARS-CoV-2 antigen-specific IgG, IgA, and  
708 IgM. Darker shades of green indicate higher whereas darker shades of red indicate lower  
709 sensitivity and specificity. *Note.* Sino Biol.: Sino Biological; NAC: Native Antigen Company; N:  
710 nucleocapsid protein; ECD: S1: S1 subunit of spike protein; S2: S2 subunit of spike protein;  
711 ectodomain (S1 subunit+S2 subunit of the spike protein); RBD: receptor binding domain; (h):



712 produced in human cell; (i): produced in insect cell; Se: Sensitivity; Sp: specificity; MFI=mean  
713 fluorescence intensity.

714

715

716

717

718

719

720

721

722

723

724

725

726

727

728

729

730

731

732

733

734

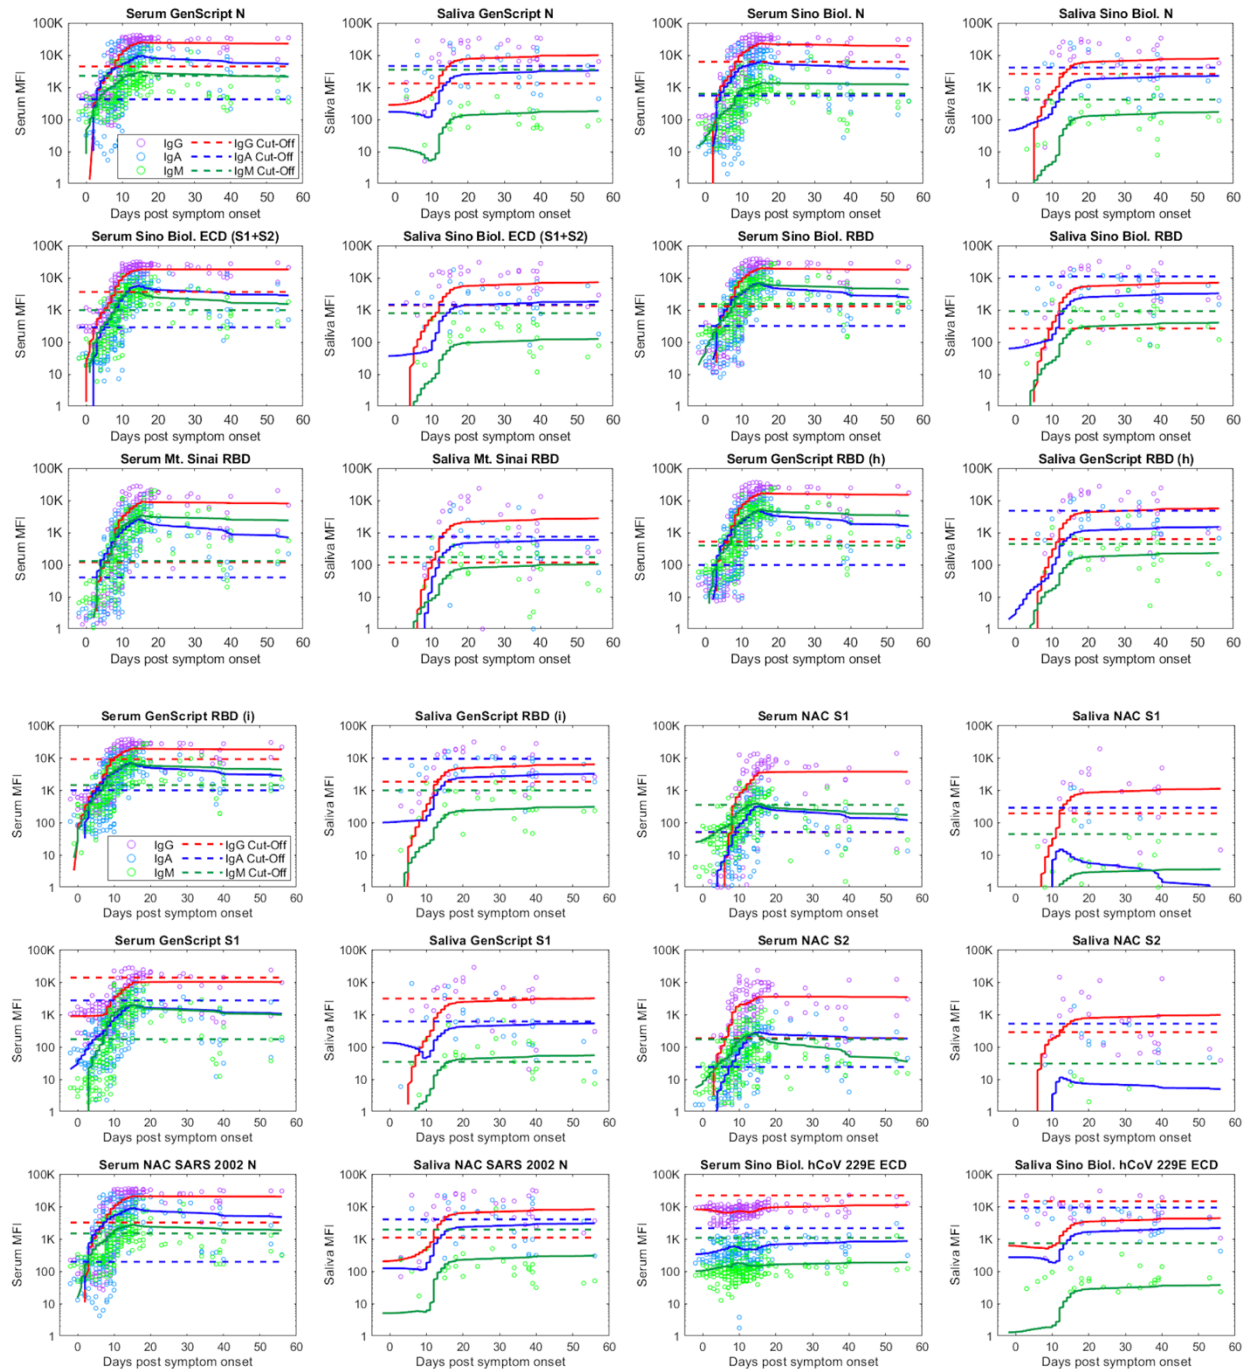

735 **Figure 6.** Comparison of saliva and serum SARS-CoV-2 antigen-specific IgG (red), IgA (blue),  
736 and IgM (green) responses vs. days post-COVID-19 symptom onset. The trajectories of IgG  
737 (red), IgA (blue), and IgM (green) responses are estimated using a LOESS curve. Dashed lines  
738 indicate cut off values for IgG (red), IgA (blue), and IgM (green). *Note.* Sino Biol.: Sino

739 Biological; NAC: Native Antigen Company; N: nucleocapsid protein; ECD: S1: S1 subunit of  
740 spike protein; S2: S2 subunit of spike protein; ectodomain (S1 subunit+S2 subunit of the spike  
741 protein); RBD: receptor binding domain; (h): produced in human cell; (i): produced in insect  
742 cell; MFI=mean fluorescence intensity.
